# Supplementary material for: Does glucagon-like peptide-1 (GLP-1) receptor agonist stimulation reduce alcohol intake in patients with alcohol dependence: study protocol of a randomised, double-blinded, placebo-controlled clinical trial
Source: PubMed Central journal article supplement — BMJ Open. 2018 Jul 16;8(7):e019562. doi: 10.1136/bmjopen-2017-019562 (PMC6082448; doi:10.1136/bmjopen-2017-019562), 2018-07-16
Supplement: bmjopen-2017-019562supp001.pdf [file bmjopen-2017-019562supp001.pdf]

## Appendix A - World Health Organization Trial Registration Data Set

| DATA CATEGORY                                 | INFORMATION                                                                                                                                                                                                    |
|-----------------------------------------------|----------------------------------------------------------------------------------------------------------------------------------------------------------------------------------------------------------------|
| Primary registry and trial identifying number | ClinicalTrials.gov NCT03232112                                                                                                                                                                                 |
| Date of registration in primary registry      | 20.07.17                                                                                                                                                                                                       |
| Secondary identifying numbers                 | The Regional Committee on Biomedical Research Ethics (journal number H-17003043), The Danish Data Protection Agency (protocol number RHP-2017-029) and the Danish Medical Agency (EudraCT 2016-003343-11)      |
| Source(s) of monetary or material support     | Region Hovedstadens Forskningsfond, Region Hovedstadens Psykiatri and Fonden Novavi. The manufacturer of Bydureon®, AstraZeneca A/S, has no financial interest or involvement in this project.                 |
| Primary sponsor                               | Fonden Novavi                                                                                                                                                                                                  |
| Secondary sponsor(s)                          | Region Hovedstadens Forskningsfond, Region Hovedstadens Psykiatri                                                                                                                                              |
| Contact for public queries                    | Mette Kruse Klausen<br>MD, Psychiatric Centre Copenhagen,<br>Rigshospitalet, Copenhagen University Hospital,<br>Denmark                                                                                        |
| Contact for scientific queries                | Anders Fink-Jensen<br>MD DMSc, Department O (Rigshospitalet),<br>Psychiatric Centre Copenhagen, Copenhagen<br>University Hospital, Denmark                                                                     |
| Public title                                  | Does glucagon-like peptide-1 (GLP-1) receptor agonist stimulation reduce alcohol intake in patients with alcohol dependence? Study protocol of a randomized, double-blinded, placebo-controlled clinical trial |
| Scientific title                              | Does glucagon-like peptide-1 (GLP-1) receptor agonist stimulation reduce alcohol intake in patients with alcohol dependence? Study protocol of a randomized, double-blinded, placebo-controlled clinical trial |
| Countries of recruitment                      | Denmark                                                                                                                                                                                                        |
| Health condition(s) or problem(s) studied     | Addiction                                                                                                                                                                                                      |

## Appendix A - World Health Organization Trial Registration Data Set

|                                      |                                                                                                                                                                                                                                                                                                                                                                                                                                                                                                                                                                                                                                                                                                                                                                                                                                          |
|--------------------------------------|------------------------------------------------------------------------------------------------------------------------------------------------------------------------------------------------------------------------------------------------------------------------------------------------------------------------------------------------------------------------------------------------------------------------------------------------------------------------------------------------------------------------------------------------------------------------------------------------------------------------------------------------------------------------------------------------------------------------------------------------------------------------------------------------------------------------------------------|
| Intervention(s)                      | 2 mg of exenatide prolonged release injection (once-weekly) vs placebo (0.9% saline)                                                                                                                                                                                                                                                                                                                                                                                                                                                                                                                                                                                                                                                                                                                                                     |
| Key inclusion and exclusion criteria | <p>Key inclusion criteria:</p> <ul style="list-style-type: none"> <li>• Diagnosed with alcohol dependence according to the criteria of ICD-10, World Health Organization and DSM-5 (for the equivalent diagnosis of alcohol use disorder)</li> <li>• Age 18 - 70 years (both included)</li> <li>• Heavy alcohol drinking defined as having alcohol consumption over 60 g of alcohol per day (men) or 48 g of alcohol per day (women) for at least 5 days in the past 30 days prior to inclusion.</li> </ul> <p>Key exclusion criteria:</p> <ul style="list-style-type: none"> <li>• Severe psychiatric or somatic disease</li> <li>• Concomitant pharmacotherapy against alcohol dependence i.e. disulfiram, naltrexone, acamprosate and nalmefene or treatment with any of these compounds within 1 month prior to inclusion</li> </ul> |
| Study type                           | The present study is a 26-week, double-blinded, randomized, placebo-controlled clinical trial, designed to evaluate the effects of exenatide vs. placebo in 114 patients diagnosed with alcohol dependence.                                                                                                                                                                                                                                                                                                                                                                                                                                                                                                                                                                                                                              |
| Date of first enrolment              | 9th of august 2017                                                                                                                                                                                                                                                                                                                                                                                                                                                                                                                                                                                                                                                                                                                                                                                                                       |
| Target sample size                   | 114                                                                                                                                                                                                                                                                                                                                                                                                                                                                                                                                                                                                                                                                                                                                                                                                                                      |
| Recruitment status                   | Recruiting                                                                                                                                                                                                                                                                                                                                                                                                                                                                                                                                                                                                                                                                                                                                                                                                                               |
| Primary outcome(s)                   | <i>The primary endpoint</i> is percent reduction in total number of heavy drinking days, defined as days with an excess intake of 60/48 grams of alcohol per day (men and women, respectively) the previous 30 days from baseline to follow-up after 26 weeks of treatment, measured by TFLB method.                                                                                                                                                                                                                                                                                                                                                                                                                                                                                                                                     |
| Key secondary outcomes               | The secondary endpoints include changes in total                                                                                                                                                                                                                                                                                                                                                                                                                                                                                                                                                                                                                                                                                                                                                                                         |

## Appendix A - World Health Organization Trial Registration Data Set

|  |                                                                                                                                                                                                                                                                                                                                                                                                                                                                                                                                                                                                           |
|--|-----------------------------------------------------------------------------------------------------------------------------------------------------------------------------------------------------------------------------------------------------------------------------------------------------------------------------------------------------------------------------------------------------------------------------------------------------------------------------------------------------------------------------------------------------------------------------------------------------------|
|  | <p>alcohol consumption (g/30 days measured by TLFB), changes in number of days without alcohol consumption and PACS score, change in AUDIT score, change in DUDIT score, change in cognitive performance on the SCIP-test, change in the liver parameters gamma-glutamyltransferase (GGT), alanine aminotransferase (ALAT) and PEth. Other parameters will be mean cell volume (MCV), changes in body weight, blood pressure, pulse, overall glycaemic control parameters (HbA1c), kidney function (p-creatinine, eGFR and urine albumin/creatinine ratio) and measures of health (SF-36 and SCL-92).</p> |
|--|-----------------------------------------------------------------------------------------------------------------------------------------------------------------------------------------------------------------------------------------------------------------------------------------------------------------------------------------------------------------------------------------------------------------------------------------------------------------------------------------------------------------------------------------------------------------------------------------------------------|
